# Supplementary material
Source: Springer Nature journal article supplement (https://www.springermedizin.de/resource/supplementary/12967_2013_1786_MOESM2_ESM.pdf/9574878)

## Supplemental Figure 2.

**A**

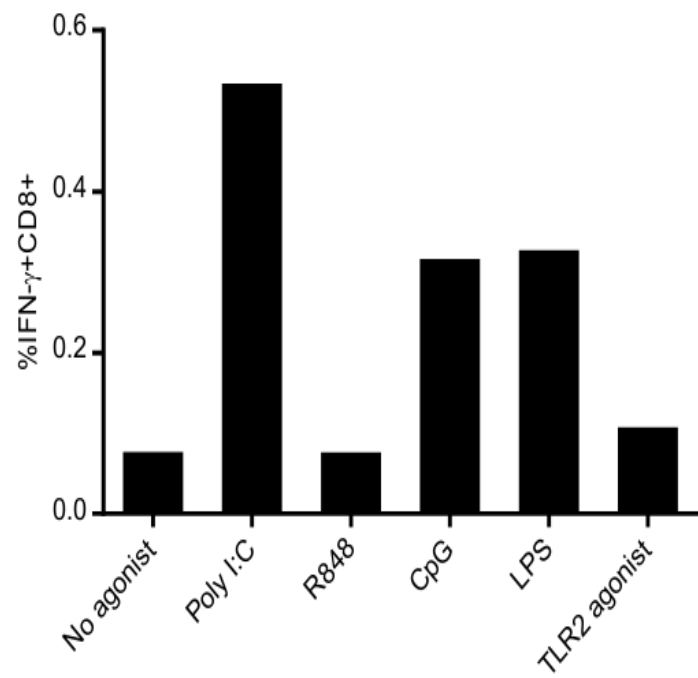

**B**

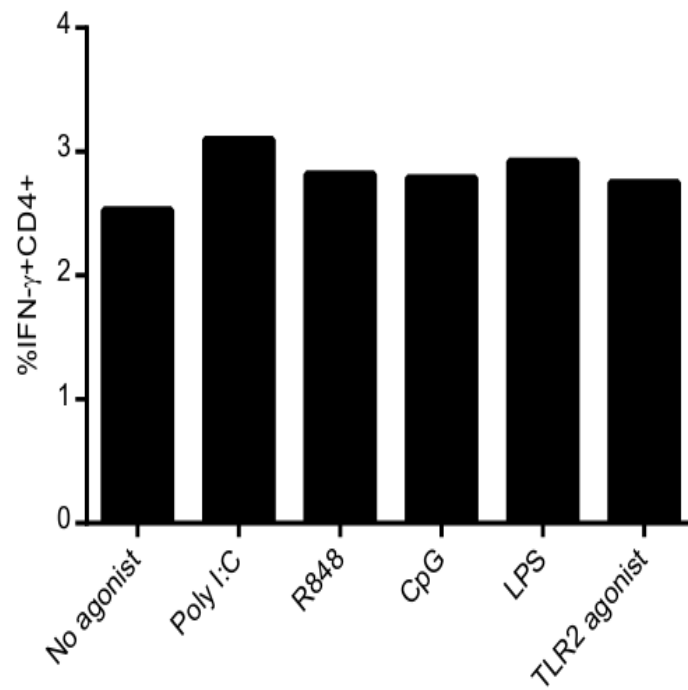

Supplement: MOESM2 [file 9574878]
